# Supplementary material for: Induction of Endogenous Antimicrobial Peptides to Prevent or Treat Oral Infection and Inflammation
Source: MDPI journal article supplement (doi:10.3390/antibiotics12020361), 2023-02-09
Supplement: s1 [file s1]

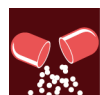

**Supplemental Table S1.** Many of the roles antimicrobial peptides (AMPs) play in inflammation; innate and adaptive immunity; angiogenesis, vasculogenesis, and wound healing; and pain antinociception.

| AMP                                  | µg/ml | µM   | Specific activity (by category)                                                                                                                 |
|--------------------------------------|-------|------|-------------------------------------------------------------------------------------------------------------------------------------------------|
| <b>Roles of AMPs in inflammation</b> |       |      |                                                                                                                                                 |
| LL-37                                | 0.1   | 0.02 | Binds microbial antigens: a 37-mer of human CAP187 binds to lipopolysaccharide (LPS) [169]                                                      |
| HBD3                                 | 1.0   | 0.19 | Binds microbial antigens: HBD3 binds to putative binding sites on <i>P. gingivalis</i> HagB [164]                                               |
| HBD1                                 | 1.0   | 0.25 | Binds microbial antigens: HBD1 binds to putative binding sites on <i>Porphyromonas gingivalis</i> hemagglutinin B (HagB) [164]                  |
| Histatin 5                           | 1.0   | 0.30 | Binds microbial antigens: Histatin 5 binds to putative binding sites on <i>P. gingivalis</i> HagB [164]                                         |
| HBD3                                 | 10.0  | 1.94 | Attenuated pathway signaling: HBD3 attenuated phosphorylated ERK1/2 signals to microbial agonist [163]                                          |
| LL-37                                | 20.0  | 4.45 | Attenuated expression of genes: LL-37 suppressed LPS-induced genes in human monocytes [172]                                                     |
| HBD1                                 | 1.0   | 0.25 | Attenuated cytokine response: HBD1 induced lower IL6 and KC responses to rHagB in nasal wash fluid of mice than those given rHagB alone [202]   |
| HBD3                                 | 1.0   | 0.19 | Attenuated cytokine response: HBD3 attenuated proinflammatory cytokine responses to co-administered agonists [163]                              |
| HBD3                                 | 1.0   | 0.19 | Attenuated cytokine response: HBD3 induced lower IL6 and KC responses to rHagB in nasal wash fluid of mice than those given rHagB alone [202]   |
| HBD3                                 | 1.0   | 0.19 | Attenuated cytokine response: HBD3 modulated cytokine responses to a microbial antigen [203]                                                    |
| HNP-1                                | 1.0   | 0.29 | Attenuated cytokine response: HNP-1 induced lower KC responses to rHagB in nasal wash fluid of mice than those given rHagB alone [202]          |
| HNP-2                                | 1.0   | 0.29 | Attenuated cytokine response: HNP-2 induced lower IL6 and KC responses to rHagB in nasal wash fluid of mice than those given rHagB alone [202]  |
| LL-37                                | 1.0   | 0.22 | Attenuated cytokine response: 1-15 µg/ml LL-37 attenuated LTA-induced expression of TNF-α in RAW264.7 cells and primary mouse macrophages [204] |
| LL-37                                | 1.0   | 0.22 | Attenuated cytokine response: LL-37 attenuated LPS-induced expression of TNF-α in THP-1 cells [172]                                             |
| LL-37                                | 11.3  | 2.50 | Attenuated cytokine response: LL-37 attenuated LPS-induced expression of chemokines and cytokines in gingival fibroblasts [205]                 |
| LL-37                                | 5.0   | 1.11 | Activated pathway signaling: LL-37 activated EGFR signaling in HCEC [206]                                                                       |
| HNP-1-3                              | 8.0   | 2.32 | Enhanced gene expression: HNP-1-3 cause an increase in NCI-H292 human lung cells mucin gene expression [207]                                    |
| HBD1                                 | 0.1   | 0.03 | Enhanced cytokine response: HBD1 increased GM-CSF in gingival keratinocytes [208]                                                               |
| HBD1                                 | 20.0  | 5.08 | Enhanced cytokine response: HBD1 induced the production of CCBMs [155]                                                                          |
| HBD2                                 | 2.0   | 0.46 | Enhanced cytokine response: 2.0-32.0 µg/ml HBD2 induced production of IL6, IL8, and IL10 from human PBMCs [155]                                 |
| HBD2                                 | 5.0   | 1.15 | Enhanced cytokine response: HBD2 increased IL6 and IL8 in gingival keratinocytes [208]                                                          |

|                                         |       |       |                                                                                                                                                                 |
|-----------------------------------------|-------|-------|-----------------------------------------------------------------------------------------------------------------------------------------------------------------|
| HBD2                                    | 10.0  | 2.31  | Enhanced cytokine response: HBD2, HBD3, HBD4, and LL-37 induced IL18 transcription or IL18 expression from human keratinocytes [209]                            |
| HBD2                                    | 20.0  | 4.61  | Enhanced cytokine response: HBD2 induced the production of CCBMs [155]                                                                                          |
| HBD3                                    | 5.0   | 0.97  | Enhanced cytokine response: HBD3 increased IL-1 $\beta$ in gingival keratinocytes [208]                                                                         |
| HBD3                                    | 10.0  | 1.94  | Enhanced cytokine response: HBD2, HBD3, HBD4, and LL-37 Induced IL18 transcription or IL18 expression from human keratinocytes [209]                            |
| HBD3                                    | 10.1  | 2.00  | Enhanced cytokine response: HBD3 modulated cytokine responses to a microbial antigen [203]                                                                      |
| HBD3                                    | 20.0  | 3.87  | Enhanced cytokine response: HBD3 induced the production of CCBMs [155]                                                                                          |
| HNP-1-3                                 | 3.0   | 0.87  | Enhanced cytokine response: HNP-1-3-induced IL8 release from A549 airway cells [210]                                                                            |
| HNP-1-3                                 | 100.0 | 29.00 | Enhanced cytokine response: HNP-1 induced cytokine expression by primary bronchial epithelial cells (PBEC) [211]                                                |
| HNP-1-3                                 | 100.0 | 29.00 | Enhanced cytokine response: HNP-1-3 induced cytokine expression by A549 cells [211]                                                                             |
| LL-37                                   | 0.5   | 0.11  | Enhanced cytokine response: LL-37 induced heparin-binding EGF-like growth factor release in THCE cells [206]                                                    |
| LL-37                                   | 5.0   | 1.11  | Enhanced cytokine response: LL-37 induced heparin-binding EGF-like growth factor release in THCE cells [206]                                                    |
| LL-37                                   | 10.0  | 2.22  | Enhanced cytokine response: HBD2, HBD3, HBD4, and LL-37 Induced IL18 transcription or expression from human keratinocytes [209]                                 |
| LL-37                                   | 15    | 3.34  | Enhanced cytokine response: Over 15 ug/ml LL-37 caused cell damage and increased TNF- $\alpha$ expression in RAW264.7 cells and primary mouse macrophages [204] |
| LL-37                                   | 50.0  | 11.12 | Enhanced cytokine response: LL-37-derived mature dendritic cells produce a characteristic Th-1-inducing cytokine profile                                        |
| <b>Roles of AMPs in innate immunity</b> |       |       |                                                                                                                                                                 |
| HNP-1                                   |       | 0.01  | Chemotactic activity: HNP-1 was chemotactic for monocytes [212]                                                                                                 |
| HNP-1-3                                 | 100.0 | 29.00 | Chemotactic activity: HNP-1 was chemotactic for A549 cells and primary bronchial epithelial cells (PBEC) [211]                                                  |
| HNP-1-3                                 | 100.0 | 29.00 | Chemotactic activity: HNP-1-3 was chemotactic for A549 cells and primary bronchial epithelial cells (PBEC) [211]                                                |
| HNP-2                                   |       | 0.01  | Chemotactic activity: HNP-2 was chemotactic for monocytes [212]                                                                                                 |
| LL-37                                   | 1.0   | 0.22  | Chemotactic activity: LL-37 was chemotactic for NCI-HJ292 bronchial epithelial cells [213]                                                                      |
| LL-37                                   | 5.0   | 1.11  | Chemotactic activity: LL-37 was chemotactic for mast cells [214]                                                                                                |
| LL-37                                   | 5.0   | 1.11  | Chemotactic activity: 5.0-20.0 ug/ml LL-37 was chemotactic for NCI-HJ292 bronchial epithelial cells [213]                                                       |
| LL-37                                   | 20.0  | 4.45  | Chemotactic activity: 5.0-20.0 ug/ml LL-37 was chemotactic for NCI-HJ292 bronchial epithelial cells [213]                                                       |
| LL-37                                   | 4.5   | 1.00  | Promoted cell migration: LL-37 promoted migration of gingival fibroblasts [205]                                                                                 |
| LL-37                                   | 4.5   | 1.00  | Promoted cell migration: LL-37 promoted proliferation of gingival fibroblasts [205]                                                                             |
| HNP-1-3                                 | 8.0   | 2.32  | Promoted cell migration: HNP-1-3 increase in NCI-H292 human lung cell migration [207]                                                                           |
| LL-37                                   | 50.0  | 11.12 | Increased cell markers: LL-37-derived mature dendritic cells had increased expression of CD makers on the surface of immature dendritic cells [179]             |

|                                           |      |       |                                                                                                                  |
|-------------------------------------------|------|-------|------------------------------------------------------------------------------------------------------------------|
| HBD1                                      | 5.0  | 1.27  | Induced proliferation: HBD1 induced the proliferation of PLE cells [215]                                         |
| HBD2                                      | 5.0  | 1.15  | Induced proliferation: HBD2 induced endothelial cell proliferation [216]                                         |
| HBD2                                      | 5.0  | 1.15  | Induced proliferation: HBD2 induced the proliferation of epithelial cells, KB, SCC-9 and PLE [215]               |
| HBD2                                      | 10.0 | 2.31  | Induced proliferation: HBD2 induced endothelial cell proliferation [216]                                         |
| HBD3                                      | 5.0  | 0.97  | Induced proliferation: HBD3 induced epithelial cell and fibroblast proliferation [215]                           |
| HBD3                                      | 8.0  | 1.55  | Induced proliferation: HBD3 induced fibroblast proliferation [215]                                               |
| HNP-1                                     | 8.0  | 2.32  | Induced proliferation: 5-8 µg/ml HNP-1 induced proliferation of epithelial cells [215]                           |
| HNP-1-3                                   | 1.0  | 0.29  | Induced proliferation: HNP induced proliferation and T helper cytokine expression profiles of CD4+ T-cells [217] |
| HNP-1-3                                   | 1.0  | 0.29  | Induced proliferation: HNP-1 induced PLE oral epithelial cell proliferation [215]                                |
| HNP-1-3                                   | 4.0  | 1.16  | Induced proliferation: 4.0-10.0 µg/ml HNPs induced proliferation of A549 human lung cells [218]                  |
| HNP-1-3                                   | 5.0  | 1.45  | Induced proliferation: HNP induced epithelial cell proliferation [215]                                           |
| HNP-1-3                                   | 5.0  | 1.45  | Induced proliferation: HNP-1 induced primary epithelial cell proliferation [215]                                 |
| HNP-1-3                                   | 8.0  | 2.32  | Induced proliferation: HNP-1 induced KB cell proliferation [215]                                                 |
| HNP-1-3                                   | 8.0  | 2.32  | Induced proliferation: HNP-1 induced primary epithelial cell proliferation [215]                                 |
| HNP-1-3                                   | 10.0 | 2.90  | Induced proliferation: 4.0-10.0 µg/ml HNPs induced proliferation of A549 human lung cells [218]                  |
| LL-37                                     | 1.0  | 0.22  | Induced proliferation: LL-37 induced NCI-H292 bronchial epithelial cell proliferation [213]                      |
| LL-37                                     | 5.0  | 1.11  | Induced proliferation: LL-37 induced NCI-H292 bronchial epithelial cell proliferation [213]                      |
| LL-37                                     | 10.0 | 2.22  | Induced proliferation: LL-37 induced NCI-H292 bronchial epithelial cell proliferation [213]                      |
| LL-37                                     | 20.0 | 4.45  | Induced proliferation: LL-37 induced NCI-H292 bronchial epithelial cell proliferation [213]                      |
| LL-37                                     | 50.0 | 11.12 | Induced proliferation: LL-37-derived mature dendritic cells induced IFN-γ-secreting T-cell proliferation         |
| LL-37                                     | 4.5  | 1.00  | Suppressed apoptosis: LL-37 suppressed apoptosis in keratinocytes [219]                                          |
| HBD1                                      | 10.0 | 2.54  | Decrease in cell number: HBD1 decreased the number of fibroblasts [215]                                          |
| HBD1                                      | 50.0 | 12.70 | Decrease in cell number: HBD1 caused a decrease in KB cell number [215]                                          |
| HBD2                                      | 30.0 | 6.92  | Cell cytotoxicity: HBD2 decreased KB cell number [215]                                                           |
| HNP-1-3                                   | 50.0 | 14.50 | Cell cytotoxicity: HNP-1 was cytotoxic for epithelial cells and fibroblasts [215]                                |
| HNP-1-3                                   | 50.0 | 14.50 | Cell cytotoxicity: HNPs were cytotoxic to A549 human lung cells [218]                                            |
| LL-37                                     | 10.0 | 2.22  | Cell cytotoxicity: LL-37 was cytotoxic for HCECs [206]                                                           |
| LL-37                                     | 11.3 | 2.50  | Cell cytotoxicity: 11.3-45.0 µg/ml LL-37 was cytotoxic to gingival fibroblasts [205]                             |
| LL-37                                     | 20.0 | 4.45  | Cell cytotoxicity: 20, 50 µg/ml LL-37 was cytotoxic for NCI-H292 bronchial epithelial cells [213]                |
| LL-37                                     | 45.0 | 10.01 | Cell cytotoxicity: 11.3-45.0 µg/ml LL-37 was cytotoxic to gingival fibroblasts [205]                             |
| LL-37                                     | 50.0 | 11.12 | Cell cytotoxicity: 20, 50 µg/ml LL-37 was cytotoxic for primary airway epithelial cells [213]                    |
| <b>Roles of AMPs in adaptive immunity</b> |      |       |                                                                                                                  |
| LL-37                                     | 50.0 | 11.12 | Induced cell differentiation: LL-37 treated dendritic cells were larger with more surface filopodia [179]        |

|                                                                         |       |       |                                                                                                                                                    |
|-------------------------------------------------------------------------|-------|-------|----------------------------------------------------------------------------------------------------------------------------------------------------|
| LL-37                                                                   | 50.0  | 11.12 | Increased antigen uptake: LL-37 treated dendritic cells bound and took up more FITC-labeled dextran [179]                                          |
| LL-37                                                                   | 50.0  | 11.12 | Increased co-stimulatory molecule expression: LL-37 increased the expression of CD11b, CD86, and CD83 [179]                                        |
| LL-37                                                                   | 50.0  | 11.12 | Enhanced Th1 cytokine response: LL-37 treated dendritic cells exposed to LPS produced a T helper type 1 (TH1) cell inducing cytokine profile [179] |
| HBD1                                                                    | 1.0   | 0.25  | Enhanced antibody response: HBD1 induced higher OVA-specific serum IgG and higher OVA-specific serum IgM in mice [220]                             |
| HBD2                                                                    | 1.0   | 0.23  | Enhanced antibody response: HBD2 induced higher OVA-specific serum IgG, lower serum IgM in mice [220]                                              |
| HBD3                                                                    | 1.0   | 0.19  | Enhanced antibody response: HBD3 induced higher rHagB-specific serum IgG in mice than those immunized with rHagB alone [202]                       |
| HNP-1                                                                   | 1.0   | 0.29  | Enhanced antibody response: HNP-1 induced higher OVA-specific serum IgG and lower OVA-specific serum IgM in mice [220]                             |
| HNP-1                                                                   | 1.0   | 0.29  | Enhanced antibody response: HNP-1 induced higher rHagB-specific serum IgG in mice than those immunized with rHagB alone [202]                      |
| HNP-1-3                                                                 | 1.0   | 0.29  | Enhanced antibody response: HNP enhanced IgG and IgM antibody responses to co-administered antigen [217]                                           |
| HNP-2                                                                   | 1.0   | 0.29  | Enhanced antibody response: HNP-2 induced low OVA-specific serum IgG and higher OVA-specific serum IgM in mice [220]                               |
| HNP-1-3                                                                 | 5.0   | 1.45  | Enhanced antibody response: HNP enhanced IgG and IgM antibody responses to co-administered antigen [217]                                           |
| HNP-1-3                                                                 | 50.0  | 14.50 | No cell number increase: HNP-1-3 did not cause an increase in NCI-H292 human lung cell mucin gene expression [207]                                 |
| HBD3                                                                    | 50.0  | 9.69  | No cytotoxicity: HBD3 was not cytotoxic to epithelial cells, KB, SCC-9 and PLE [215]                                                               |
| LL-37                                                                   | 50.0  | 11.12 | No cytotoxicity: LL-37 was not cytotoxic to immature dendritic cells [179]                                                                         |
| <b>Roles of AMPs in angiogenesis, vasculogenesis, and wound healing</b> |       |       |                                                                                                                                                    |
| HBD2                                                                    | 0.5   | 0.12  | Angiogenesis: HBD2 induced the formation of endothelial tubes and capillary-like structures [216]                                                  |
| HBD3                                                                    | 200.0 | 58.00 | Angiogenesis: HBD3 enhanced fibroblast accumulation <i>in vivo</i> and migration and proliferation <i>in vitro</i> [178]                           |
| HBD3                                                                    | 200.0 | 58.00 | Angiogenesis: HBD3 increased transcription of angiogenic growth factors <i>bfgf</i> , <i>pdgf</i> , and <i>vegf</i> [178]                          |
| HBD3                                                                    | 200.0 | 58.00 | Angiogenesis: wounds treated with HBD3 increased new vessel formation [178]                                                                        |
| HNP-1-3                                                                 | 50.0  | 14.50 | Delayed wound closure: HNP-1-3 delayed wound closure of NCI-H292 human lung cells [207]                                                            |
| HBD2                                                                    | 0.5   | 0.12  | Enhanced wound closure: HBD2 increased the speed of HUVEC wound closure [216]                                                                      |
| HBD3                                                                    | 200   | 58.00 | Enhanced wound closure: HBD3 was the most effective concentration for accelerating wound healing in mice [178]                                     |
| HNP-1-3                                                                 | 4.0   | 1.16  | Enhanced wound closure: 4-10 µg/ml HNP-1-3 enhanced wound closure in NCI-H292 human lung cells [207]                                               |

|         |      |       |                                                                                                                 |
|---------|------|-------|-----------------------------------------------------------------------------------------------------------------|
| HNP-1-3 | 10.0 | 2.90  | Enhanced wound closure: 4-10 µg/ml HNP-1-3 enhanced wound closure in NCI-H292 human lung cells [207]            |
| HNP-1-3 | 8.0  | 2.32  | Enhanced wound closure: 4-10 µg/ml HNPs enhanced repair in mechanically wounded NCI-H292 cell monolayers [207]  |
| LL-37   | 0.5  | 0.11  | Enhanced wound closure: LL-37 enhanced epithelial wound healing [206]                                           |
| LL-37   | 5.0  | 1.11  | Enhanced wound closure: LL-37 enhanced closure in scraped primary airway epithelial cell cultures [213]         |
| LL-37   | 11.3 | 2.50  | Enhanced wound closure: LL-37 induced antifibrotic activity beneficial for wound healing without fibrosis [205] |
| HBD2    | 0.5  | 0.12  | Promoted cell migration: HBD2 induced the migration of HUVEC [216]                                              |
| HBD2    | 10   | 2.31  | Promoted cell migration: HBD2 induced the migration of keratinocytes [152]                                      |
| HBD3    | 0.5  | 0.11  | Promoted cell migration: HBD3 induced the migration and proliferation of human fibroblasts [178]                |
| HBD3    | 5    | 0.97  | Promoted cell migration: HBD3 induced the migration of keratinocytes [152]                                      |
| HBD4    | 10   | 2.22  | Promoted cell migration: HBD4 induced the migration of keratinocytes [152]                                      |
| HBD3    | 200  | 58.00 | Enhanced wound healing: HBD3 was the most effective concentration for accelerating wound healing in mice [178]  |

#### Roles of AMPs in pain nociception

|           |           |                |                                                                                                                                                                                                                                                    |
|-----------|-----------|----------------|----------------------------------------------------------------------------------------------------------------------------------------------------------------------------------------------------------------------------------------------------|
| PCD-1     | 20.0      | 3.69           | Pain antinociception: 20 µg PCD-1 was injected (intrathecal injection) into rats and significantly inhibited chronic constriction injury-induced thermal hyperalgesia, mechanical allodynia, cold allodynia, and weight-bearing deficits [189]     |
| Ueq 12-1  | 0.2 mg/kg | Not applicable | Pain antinociception: 0.2 mg/kg Ueq 12-1 was injected (i.v.) into mice and reduced allyl isothiocyanate -induced paw licking, guarding, and paw edema and reduced Freund's complete Adjuvant-induced thermal hyperalgesia and paw edema [188]      |
| Alloferon | 0.1265    | 0.10           | Pain antinociception: 100 nM Alloferon 1 was injected (i.c.v.) through implanted cannulas in the right lateral brain ventricle of rats and induced significant antinociceptive effects in the tail immersion and the hot plate tests of pain [186] |
| CgA       | 0.5 mg/kg | Not applicable | Pain antinociception: 0.5 mg/kg CgA 47–66 was injected (i.p.) into rats and induced maximal antinociceptive effects in their responses in the acetic acid-induced writhes test of pain [192]                                                       |
| AMV       | 6 mg/kg   | Not applicable | Pain antinociception: 50 or 100 µg <i>Apis mellifera</i> venom (AMV) in 20 µl was injected into foot pads of mice and induced antinociceptive effects in their responses in the hot-plate pain tests of pain [187]                                 |
