# Supplementary material for: Induction of Endogenous Antimicrobial Peptides to Prevent or Treat Oral Infection and Inflammation
Source: MDPI journal article supplement (doi:10.3390/antibiotics12020361), 2023-02-09

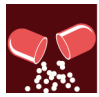

**Supplemental Fig S1.** MAPK-dependent induction of antimicrobial peptides (AMPs). A scheme showing pathways leading to MAPK-dependent induction of AMP transcription and expression by micronutrients (zinc), elements (calcium), nutrients and macronutrients (isoleucine, lactose,  $\beta$ -glucans, butyrate (BA), and phenylbutyrate (PBA)), and ultraviolet (UV) C, B, and A irradiation. Pathways leading to induction of AMP transcription and LL-37 and HBD2 expression were compiled from results reported in studies by a) Talukder et al. 2011 [47], b) Cederlund et al. 2013 [72], c) Krisanaprakornkit et al. 2002 [194], d) Nishimura et al. 2003 [12], e) Steinmann et al. 2009 [87], f) Li et al. 2009 [195], g) Schaubert et al. 2003 [89], h) Schwab et al. 2007 [90], i) Morio et al. 2022 [18], j) KEGG calcium signaling pathway [106], and k) Konno et al. [77], and l) Steubesand et al. 2009 [196].

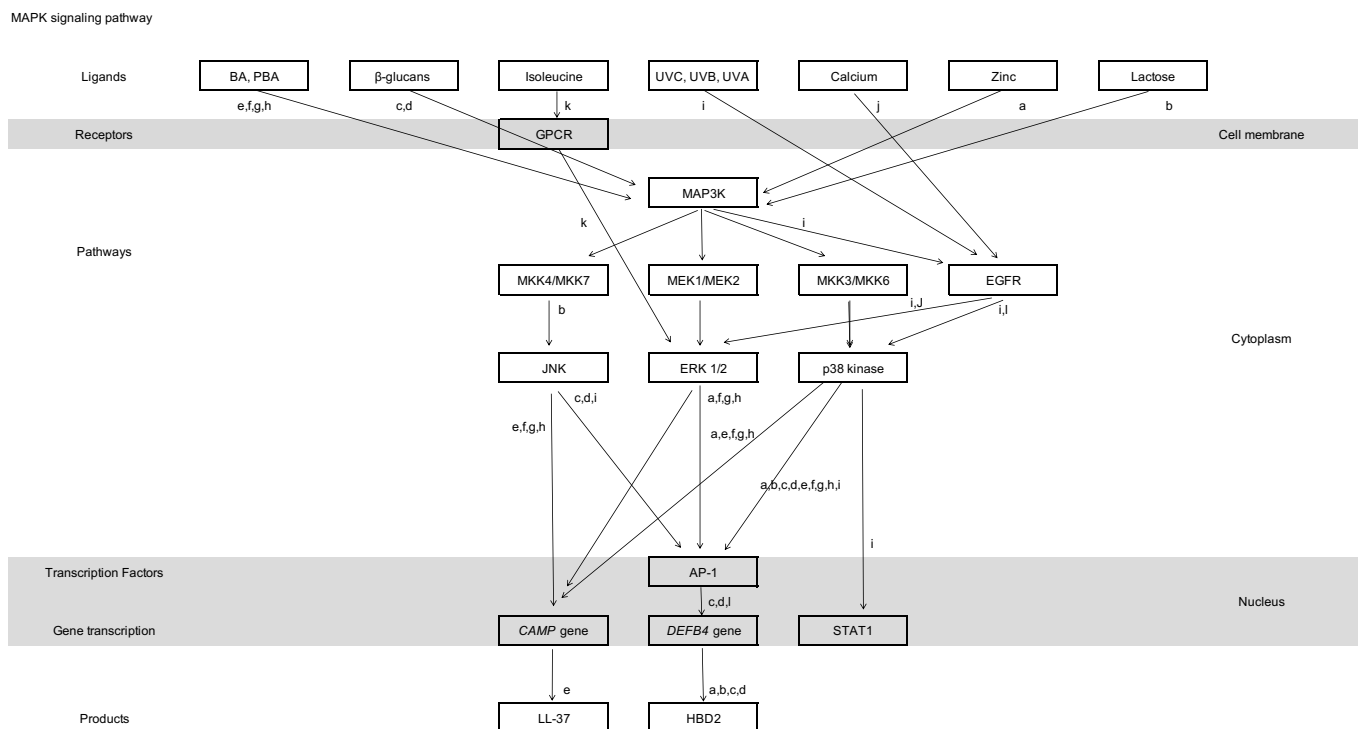

Supplement: s1 [file s1]
