# Supplementary material for: Induction of Endogenous Antimicrobial Peptides to Prevent or Treat Oral Infection and Inflammation
Source: Antibiotics (Basel). 2023 Feb 9;12(2):361. doi: 10.3390/antibiotics12020361 (PMC9952314; doi:10.3390/antibiotics12020361)
Supplement: Supplementary file 1 [file antibiotics-12-00361-s001.zip]

Archive with 7 entries (7 files):
- Antibiotics Suppl Fig S1 (02-06-23).pdf
- Antibiotics Suppl Fig S2 (02-06-23).pdf
- Antibiotics Suppl Fig S3 (02-06-23).pdf
- Antibiotics Suppl Fig S4 (02-06-23).pdf
- Antibiotics Suppl Table S1 (02-06-23).pdf
- Antibiotics Suppl Table S2 (02-06-23).pdf
- Antibiotics Suppl Table S3 (02-06-23).pdf
